# Supplementary material for: Venomics of the Central European Myrmicine Ants Myrmica rubra and Myrmica ruginodis
Source: MDPI journal article supplement (doi:10.3390/toxins14050358), 2022-05-21
Supplement: s1 [file s1]

**Table S5.** Tools used during the presented study arranged in alphabetically order. Generic parts are marked with curly brackets.

| Tool used and comments                                                 | Version | Program call with parameters                                                                                                                                                                                                                                                                                                                   |
|------------------------------------------------------------------------|---------|------------------------------------------------------------------------------------------------------------------------------------------------------------------------------------------------------------------------------------------------------------------------------------------------------------------------------------------------|
| blastn<br>(CO1 analysis against BOLD data)                             | v2.10.1 | makeblastdb -in {input_bold} \<br>-dbtype nucl \<br>-parse_seqids \<br>-title {title} \<br>-out {output}                                                                                                                                                                                                                                       |
|                                                                        |         | blastn \<br>-evalue 1e-3 \<br>-num_threads 20 \<br>-db {input_bold} \<br>-query {input} \<br>-out {output} \<br>-outfmt "6 std slen qlen ppos qcovhsp qcovs sseq qseq" \<br>-task "megablast"                                                                                                                                                  |
| blastp<br>(Tox-Prot, VenomZone, Swiss-Prot, each as query)             | v2.10.1 | cat {input}   \<br>makeblastdb -in - \<br>-dbtype nucl \<br>-out {output_prefix} \<br>-title {title}                                                                                                                                                                                                                                           |
|                                                                        |         | NUM_SEQS=\$(blastdbcmd -db {assembly_as_db} -info   grep -oP "[\d,]+(?= sequences)"   tr -d ",")<br>blastp \<br>-query "{db_as_query}" \<br>-db {assembly_as_db} \<br>-max_target_seqs \$NUM_SEQS \<br>-outfmt "6 std slen qlen ppos qcovhsp qcovs sseq qseq" \<br>-evalue 1e-3 \<br>-num_threads 2 \<br>-word_size 2 \<br>-out {output}       |
| blastp<br>(candidates for final alignments for venome serine protease) | v2.11.0 | makeblastdb -in {input_uniprot_trembl} \<br>-dbtype prot \<br>-out {output}                                                                                                                                                                                                                                                                    |
|                                                                        |         | blastp \<br>-query {input_query} \<br>-db {input_uniprot_trembl} \<br>-out {output} \<br>-outfmt "6 std slen qlen ppos qcovhsp qcovs sseq qseq sgi stitle staxids sscinames scomnames sbblastnames sskindoms salltitles" \<br>-evalue 10 \<br>-word_size 3 \<br>-matrix BLOSUM62 \<br>-max_target_seqs 500 \<br>-seg 'no' \<br>-num_threads 18 |
| blastp<br>(EGF-like toxins in TransDecoder-                            | v2.11.0 | makeblastdb \<br>-in {input_transdecoder} \<br>-dbtype prot \<br>                                                                                                                                                                                                                                                                              |

|                                      |                                                                                                                                                                                                                                                                                                                                                                                                                                                                                                                                                                                                                                                                                                                                                   |
|--------------------------------------|---------------------------------------------------------------------------------------------------------------------------------------------------------------------------------------------------------------------------------------------------------------------------------------------------------------------------------------------------------------------------------------------------------------------------------------------------------------------------------------------------------------------------------------------------------------------------------------------------------------------------------------------------------------------------------------------------------------------------------------------------|
| <p>data and in NCBI nr database)</p> | <p>-out {output}</p> <p>blastp \</p> <p>-query {input} \</p> <p>-out {output} \</p> <p>-outfmt "6 std slen qlen ppos qcovhsp qcovs sseq qseq" \</p> <p>-evaluate 10 \</p> <p>-word_size 3 \</p> <p>-matrix BLOSUM62 \</p> <p>-max_target_seqs 500 \</p> <p>-seg 'no' \</p> <p>-num_threads 8</p> <p>update_blastdb.pl nr</p> <p>update_blastdb.pl taxdb</p> <p>blastp \</p> <p>query {input_egf_like} \</p> <p>-db {input_nr} \</p> <p>-out {output} \</p> <p>-outfmt "6 std slen qlen ppos qcovhsp qcovs sseq qseq sgi stitle staxids sscinames scomnames sbblastnames sskingdoms salltitles" \</p> <p>-evaluate 10 \</p> <p>-word_size 3 \</p> <p>-matrix BLOSUM62 \</p> <p>-max_target_seqs 100 \</p> <p>-seg 'no' \</p> <p>-num_threads 8</p> |
| <p>BUSCO</p> <p>v4.1.4</p>           | <p>busco \</p> <p>--force \</p> <p>--mode tran \</p> <p>--in {input} \</p> <p>--out {output_prefix} \</p> <p>--out_path {output_dir} \</p> <p>--lineage_dataset hymenoptera_odb10.2020-08-05/hymenoptera_odb10 \</p> <p>--offline \</p> <p>--cpu 16</p>                                                                                                                                                                                                                                                                                                                                                                                                                                                                                           |
| <p>CD-HIT-EST</p> <p>v4.8.1</p>      | <p>cd-hit-est \</p> <p>-i {input} \</p> <p>-o {output} \</p> <p>-c 1 \</p> <p>-n 11 \</p> <p>-p 1 \</p> <p>-g 1 \</p> <p>-M 64000 \</p> <p>-T 32 \</p> <p>-d 40</p>                                                                                                                                                                                                                                                                                                                                                                                                                                                                                                                                                                               |
| <p>cutadapt</p> <p>v2.10</p>         | <p>cutadapt \</p> <p>--pair-filter=any \</p> <p>--nextseq-trim=15 \</p> <p>-a "AGATCGGAAGAGCACACGTCTGAACTCCAGTCA" \</p> <p>-A "AGATCGGAAGAGCGTCGTGTAGGGAAAGAGTGT" \</p> <p>--max-n 0 \</p> <p>--minimum-length 15 \</p>                                                                                                                                                                                                                                                                                                                                                                                                                                                                                                                           |

|                                                          |             |                                                                                                                                                                                                                                                                                                                                                                                                                                                                  |
|----------------------------------------------------------|-------------|------------------------------------------------------------------------------------------------------------------------------------------------------------------------------------------------------------------------------------------------------------------------------------------------------------------------------------------------------------------------------------------------------------------------------------------------------------------|
|                                                          |             | --too-short-output {output_short1} \<br>--too-short-paired-output {output_short2} \<br>--discard-casava -o {output_r1} \<br>--paired-output {output_r2} {input} \<br>--cores=32                                                                                                                                                                                                                                                                                  |
| HISAT2                                                   | v2.2.1      | hisat2-build \<br>{input} \<br>{output_prefix} \<br>-p 20<br><br>hisat2 \<br>-x {input} \<br>--rna-strandness RF \<br>-1 {input_r1} \<br>-2 {input_r2} \<br>-p 20 \<br>-q \<br>-S {output_sam} \<br>--all                                                                                                                                                                                                                                                        |
| InterProScan                                             | v55.52-86.0 | interproscan.sh \<br>--input {input} \<br>--output-file-base {output_prefix} \<br>--formats TSV,XML,JSON,GFF3 \<br>--disable-precalfc \<br>--goterms \<br>--iprlookup \<br>--pathways \<br>--seqtype p \<br>--tempdir {tempdir} \<br>--appl<br>CDD,Coils,Gene3D,Hamap,MobiDBLite,PANTHER,Pfam,Phobius,PIRSF<br>,PRINTS,ProSitePatterns,ProSiteProfiles,SFLD,SMART,SUPERFAMILY,SignalP_EUK,SignalP_GRAM_NEGATIVE,SignalP_GRAM_POSITIVE,TIGRfam,TMHMM \<br>--cpu 8 |
| IQ-TREE                                                  | v2.1.2      | iqtree \<br>-T 3 \<br>-s {input} \<br>-B 20000 \<br>--prefix {output_prefix}                                                                                                                                                                                                                                                                                                                                                                                     |
| MAFFT<br>(all alignments)                                | v7.490      | zcat {input}   \<br>mafft \<br>--localpair \<br>--maxiterate 1000 \<br>--thread 8 \<br>--reorder - > {output}                                                                                                                                                                                                                                                                                                                                                    |
| MAFFT<br>(final alignments for venom serine<br>protease) | v7.490      | mafft \<br>--maxiterate 1000 \<br>--localpair \<br>--thread 4 \<br>{input} > {output}                                                                                                                                                                                                                                                                                                                                                                            |
| MAFFT<br>(Fig. 4, EGF-like toxins)                       | v7.505      | mafft \<br>--retree 2 \<br>--reorder \<br>{input} > {output}                                                                                                                                                                                                                                                                                                                                                                                                     |

|              |         |                                                                                                                                                                                 |
|--------------|---------|---------------------------------------------------------------------------------------------------------------------------------------------------------------------------------|
| Rcorrector   | v1.0.4  | run_rcorrector.pl \<br>-t 32 \<br>-1 {input_left} \<br>-2 {input_right} \<br>-od {outputdir}                                                                                    |
| rnaSPAdes    | v3.14.1 | spades.py \<br>--rna \<br>--ss-rf \<br>-k 21,33,55 \<br>--threads 32 \<br>--memory 320 \<br>-o {output_dir} \<br>{input_left} \<br>{input_right}                                |
| SAMtools     | v1.11   | samtools sort \<br>-@ 4 \<br>-m 16384 \<br>-l 9 \<br>-o {output_bam_sorted} \<br>{input}                                                                                        |
|              |         | samtools index \<br>-@ 4 \<br>-b \<br>{input_bam_sorted} \<br>{output_bam_indexed}                                                                                              |
|              |         | samtools stats \<br>{input_bam_sorted} \<br>-@ 4 > {output_bam_stats}                                                                                                           |
|              |         | plot-bamstats \<br>-p {output_prefix} \<br>{input_bam_stats}                                                                                                                    |
| SignalP      | v6.0g   | Signalp6 \<br>--fastafile {input} \<br>--organism eukarya \<br>--output_dir {output_dir} \<br>--format all \<br>--mode slow-sequential                                          |
| StringTie    | v2.1.4  | stringtie \<br>-o {output_transcripts} \<br>-p 4 \<br>-G {input_gtf} \<br>-A {output_gene_abundance} \<br>-C {output_coverage} \<br>-b {outputdir_ballgown} \<br>-e {input_bam} |
|              |         | prepDE.py \<br>-i {outputdir_ballgown} \<br>-g {output_gene_count_matrix} \<br>-t {output_transcript_count_matrix} \<br>-l 145                                                  |
| TransDecoder | v5.5.0  | TransDecoder.LongOrfs \<br>                                                                                                                                                     |

|         |         |                                                                                                                                                                                                                                                                                                                           |
|---------|---------|---------------------------------------------------------------------------------------------------------------------------------------------------------------------------------------------------------------------------------------------------------------------------------------------------------------------------|
|         |         | -m 10 \<br>-t {input} \<br>--output_dir {output_dir}                                                                                                                                                                                                                                                                      |
| Trinity | v2.11.0 | Trinity \<br>--grid_exec "HPCRUNNER" \<br>--min_contig_length 30 \<br>--SS_lib_type RF \<br>--left {input_left} \<br>--right {input_right} \<br>--seqType fq \<br>--max_memory 200G \<br>--bflyCalculateCPU \<br>--CPU 10 \<br>--output {output_dir} \<br>--full_cleanup \<br>--normalize_max_read_cov 50 \<br>--NO_SEQTK |
| VSEARCH | v2.15.1 | vsearch \<br>--derep_prefix \<br>{input} \<br>--output {output}                                                                                                                                                                                                                                                           |

**Listing S1.** Shell script to prepare the necessary GTF-file for the program call of StringTie.

```
for i in {input_bam_sorted}
do
    samtools view -H $i
done | \
sort | \
uniq | \
perl -ne '
    if ($_ =~ /^\\@SQ\\s+SN:(\\S+)\\s+LN:(\\d+)/) {{
        print join("\\t", ($1, ".", "transcript", 1, $2, 0, "+", ".", "ID=$1")), "\\n";
    }}
' > {output}
```

**Listing S2.** Python script to calculate molecular weights and isoelectrical points.

```
from Bio import SeqIO
from Bio.SeqUtils import molecular_weight
from Bio.SeqUtils.IsoelectricPoint import IsoelectricPoint as IP

fasta = {input_proteinlist}

for seq_record in SeqIO.parse(fasta, "fasta"):
    print(seq_record.id)
    seq = seq_record.seq.rstrip("*")
    print("MW: %0.2f" % molecular_weight(seq, "protein"))
    print("pI: %0.2f" % IP(seq).pi())
```
