# Supplementary material for: Venomics of the Central European Myrmicine Ants Myrmica rubra and Myrmica ruginodis
Source: MDPI journal article supplement (doi:10.3390/toxins14050358), 2022-05-21
Supplement: s1 [file s1]

**Table S1.** Overrepresented sequences reported in FastQC during quality control. These sequences were used to collect raw read sequences for *CO1* sequence analysis.

| Species             | Overrepresented sequence                                                                                                                                                                                                                                                                                                          |
|---------------------|-----------------------------------------------------------------------------------------------------------------------------------------------------------------------------------------------------------------------------------------------------------------------------------------------------------------------------------|
| <i>M. rubra</i>     | CTCCATT TAAAAGACA AACTGATTATGCTACCTTAGCACAGTCAATTTACT<br>CTCCCAACTAAATATAAATTCATAAGTTAAAAAATCTAATTAAATCTTAT<br>CTTAATCACAATTAAGATTTTAACTTAATAACAAAATTCAAATTTTAAT<br>CTTTCGTACAAATATATTTATTTTATTAAAGATAGAAACCGATCTGGCT<br>GTCCAATCTAGTAGTGCTGAGCCCAAGTTTTTCGTCGATGGAATGACTTT<br>GTCCTTTCGTACAAATATATTTATTTTATTAAAGATAGAAACCGATCTG  |
| <i>M. ruginodis</i> | CTCCATT TAAAAGACA AACTGATTATGCTACCTTAGCACAGTCAATTTACT<br>CTCCATT TAAATTTTATCTTAATTCACATCGAGGTCGCAATCATTTTAA<br>CTCCCAACTAAATATAAATTTATAAGTTATAAAAATCTAATTAAATCTTA<br>CTTTCGTACAAATATATTTATTTTATTAAAGATAGAAACCGATCTGGCT<br>GTCCAATCTAGTAGTGCTGAGCCCAAGTTTTTCGTCGATGGAATGACTTT<br>GTCCTTTCGTACAAATATATTTATTTTATTAAAGATAGAAACCGATCTG |

**Table S2.** Results of *CO1* sequence analysis. We used overrepresented sequences to extract all corresponding raw reads with their mates, dereplicated them and ran a BLAST search against BOLD. Only hits with 100% identity and query coverage were kept. One read could match more than one record in BOLD.

|                                               | <i>Myrmica rubra</i>                                              | <i>Myrmica ruginodis</i>                                           |
|-----------------------------------------------|-------------------------------------------------------------------|--------------------------------------------------------------------|
| Reads                                         | 634,472                                                           | 1,328,614                                                          |
| Unique reads                                  | 40,978                                                            | 98,119                                                             |
| Unique reads after BLAST search and filtering | 1,045                                                             | 28,119                                                             |
| Matching BOLD records                         | 21 Formicidae<br>160 <i>Myrmica</i><br>2,343 <i>Myrmica rubra</i> | 13 Formicidae<br>43 <i>Myrmica</i><br>858 <i>Myrmica ruginodis</i> |
